# Supplementary material
Source: PubMed Central journal article supplement (PMC2148324)

**MV-H monomer**

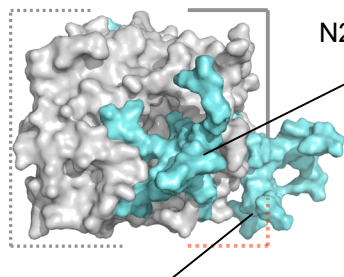

N200-linked sugar

N215-linked sugar

**MV-H dimer**

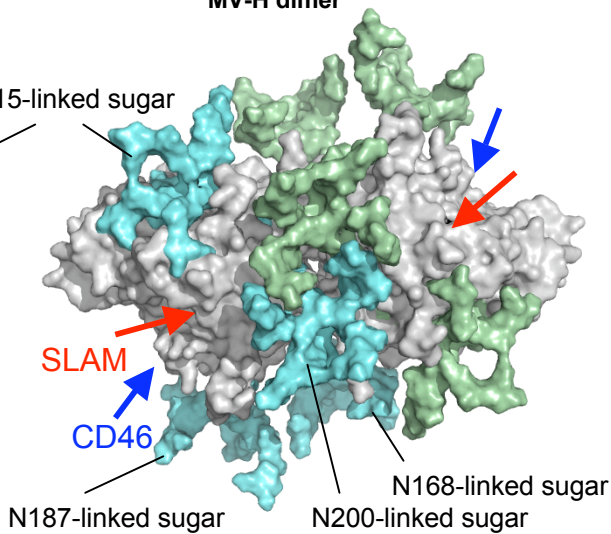

SLAM

CD46

N187-linked sugar

N168-linked sugar

N200-linked sugar

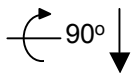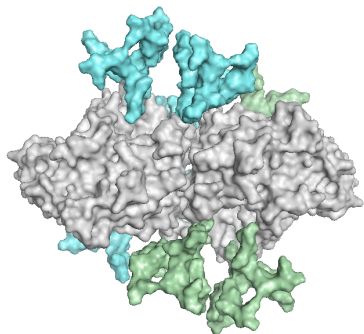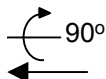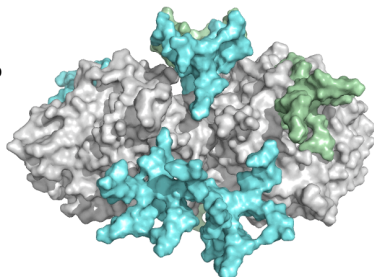

Supplement: pnas_0707830104_5.pdf [file pnas_0707830104_5.pdf]
