# Supplementary material
Source: PubMed Central journal article supplement (PMC2148324)
Supplement: pnas_0707830104_6.pdf [file pnas_0707830104_6.pdf]

**Table 2. Crystallographic data statistics**

|                                             | Native<br>(oligomannose)            | Native<br>(complex-sugar)           | SeMet $\lambda$ peak<br>(oligomannose) |
|---------------------------------------------|-------------------------------------|-------------------------------------|----------------------------------------|
| <b>Data Collection</b>                      |                                     |                                     |                                        |
| Space group                                 | <i>P4<sub>1</sub>2<sub>1</sub>2</i> | <i>P4<sub>1</sub>2<sub>1</sub>2</i> | <i>P4<sub>1</sub>2<sub>1</sub>2</i>    |
| Unit cell <i>a=b, c</i> (Å)                 | 134.09, 100.75                      | 134.55, 99.24                       | 134.27, 99.99                          |
| Wavelength (Å)                              | 0.9780                              | 1.0000                              | 0.9790                                 |
| Resolution (Å)                              | 30-2.6 (2.69-2.6)                   | 30-3.0 (3.11-3.0)                   | 30-2.65 (2.74-2.65)                    |
| $R_{\text{sym}}^*$                          | 0.080 (0.644)                       | 0.094 (0.388)                       | 0.095 (0.636)                          |
| $\langle I \rangle / \sigma I$              | 11.6 (4.3)                          | 9.4 (5.11)                          | 10.9 (4.34)                            |
| Completeness (%)                            | 99.2 (99.9)                         | 99.6 (98.1)                         | 100 (100)                              |
| Redundancy                                  | 12.1 (12.2)                         | 7.0 (6.4)                           | 6.7 (6.7)                              |
| <b>Refinement</b>                           |                                     |                                     |                                        |
| Resolution (Å)                              | 30-2.6                              | 30-3.0                              |                                        |
| No. reflections                             | 28,599                              | 18,688                              |                                        |
| $R_{\text{work}} / R_{\text{free}}^\dagger$ | 0.225 / 0.248                       | 0.227 / 0.271                       |                                        |
| No. atoms                                   |                                     |                                     |                                        |
| Protein                                     | 3,277                               | 3,242                               |                                        |
| Ligand/ion                                  | 42                                  | 28                                  |                                        |
| Water                                       | 73                                  | 0                                   |                                        |
| B-factors (Å <sup>2</sup> )                 |                                     |                                     |                                        |
| Protein                                     | 51.87                               | 58.74                               |                                        |
| Ligand/ion                                  | 94.19                               | 88.83                               |                                        |
| Water                                       | 38.48                               | -                                   |                                        |
| R.m.s deviations                            |                                     |                                     |                                        |
| Bond lengths (Å)                            | 0.0066                              | 0.0077                              |                                        |
| Bond angles (°)                             | 1.3697                              | 1.4622                              |                                        |
| Ramachandran plot                           |                                     |                                     |                                        |
| Most favored                                | 290                                 | 286                                 |                                        |
| Additional allowed                          | 63                                  | 60                                  |                                        |
| Generously allowed                          | 7                                   | 10                                  |                                        |
| Disallowed                                  | 0                                   | 1 (Q311)                            |                                        |

Highest-resolution shell is shown in parentheses.

\*  $R_{\text{sym}} = \sum |I_i - \langle I_i \rangle| / \sum I_i$ , where  $I_i$  is the observed intensity and  $\langle I_i \rangle$  is the average intensity obtained from multiple observations of symmetry-related reflections.

†  $R_{\text{work}} = \sum_{hkl} ||F_{\text{obs}}| - |F_{\text{calc}}|| / \sum_{hkl} |F_{\text{obs}}|$ . 7% of the reflections were excluded for  $R_{\text{free}}$  calculation.
