# Supplementary material
Source: PubMed Central journal article supplement (PMC2148324)
Supplement: pnas_0707830104_7.pdf [file pnas_0707830104_7.pdf]

**Table 3. Active-site residues in paramyxovirus HNs, influenza virus NA, and MV-H**

| <b>Residue</b> | <b>NDV</b> | <b>hPIV3</b> | <b>SV5</b> | <b>Flu</b> | <b>MV</b> |
|----------------|------------|--------------|------------|------------|-----------|
| <b>R1</b>      | 175        | 192          | 163        | 118        | S218      |
| <b>R4</b>      | 416        | 424          | 405        | 292        | P457      |
| <b>R5</b>      | 498        | 502          | 495        | 371        | E535      |
| <b>Y6</b>      | 526        | 530          | 523        | 406        | L566      |
| <b>E4</b>      | 401        | 409          | 390        | 277        | G440      |
| <b>E6</b>      | 547        | 549          | 544        | 425        | C583      |
| <b>D1</b>      | 198        | 216          | 187        | 151        | S247      |

NA/sialidases have strongly conserved active-site residues. Paramyxovirus HNs (NDV, SV5, hPIV3) and influenza virus NA (Flu) have those residues, but H proteins, of all morbilliviruses, do not. Corresponding amino acids in MV-H are shown. Numbering is based on the six-blade  $\beta$ -propeller sheet structure in NDV, hPIV3, and SV5. For Flu, N2 subtype numbering is used.
