# Supplementary material
Source: PubMed Central journal article supplement (PMC2148324)

**A**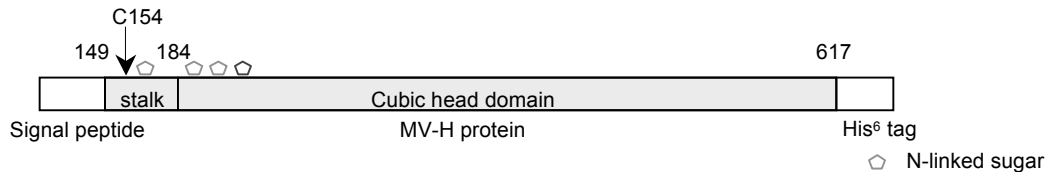**B**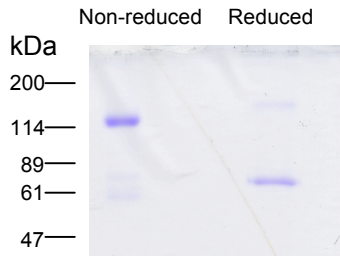**C**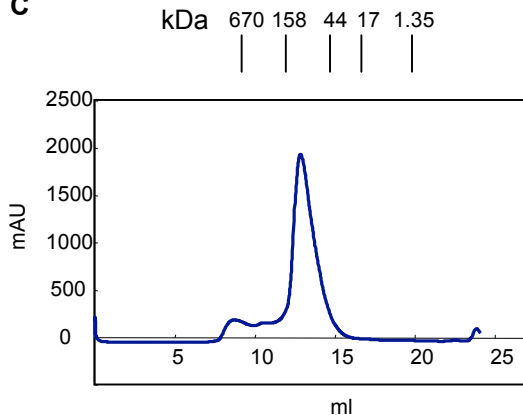

Supplement: pnas_0707830104_1.pdf [file pnas_0707830104_1.pdf]

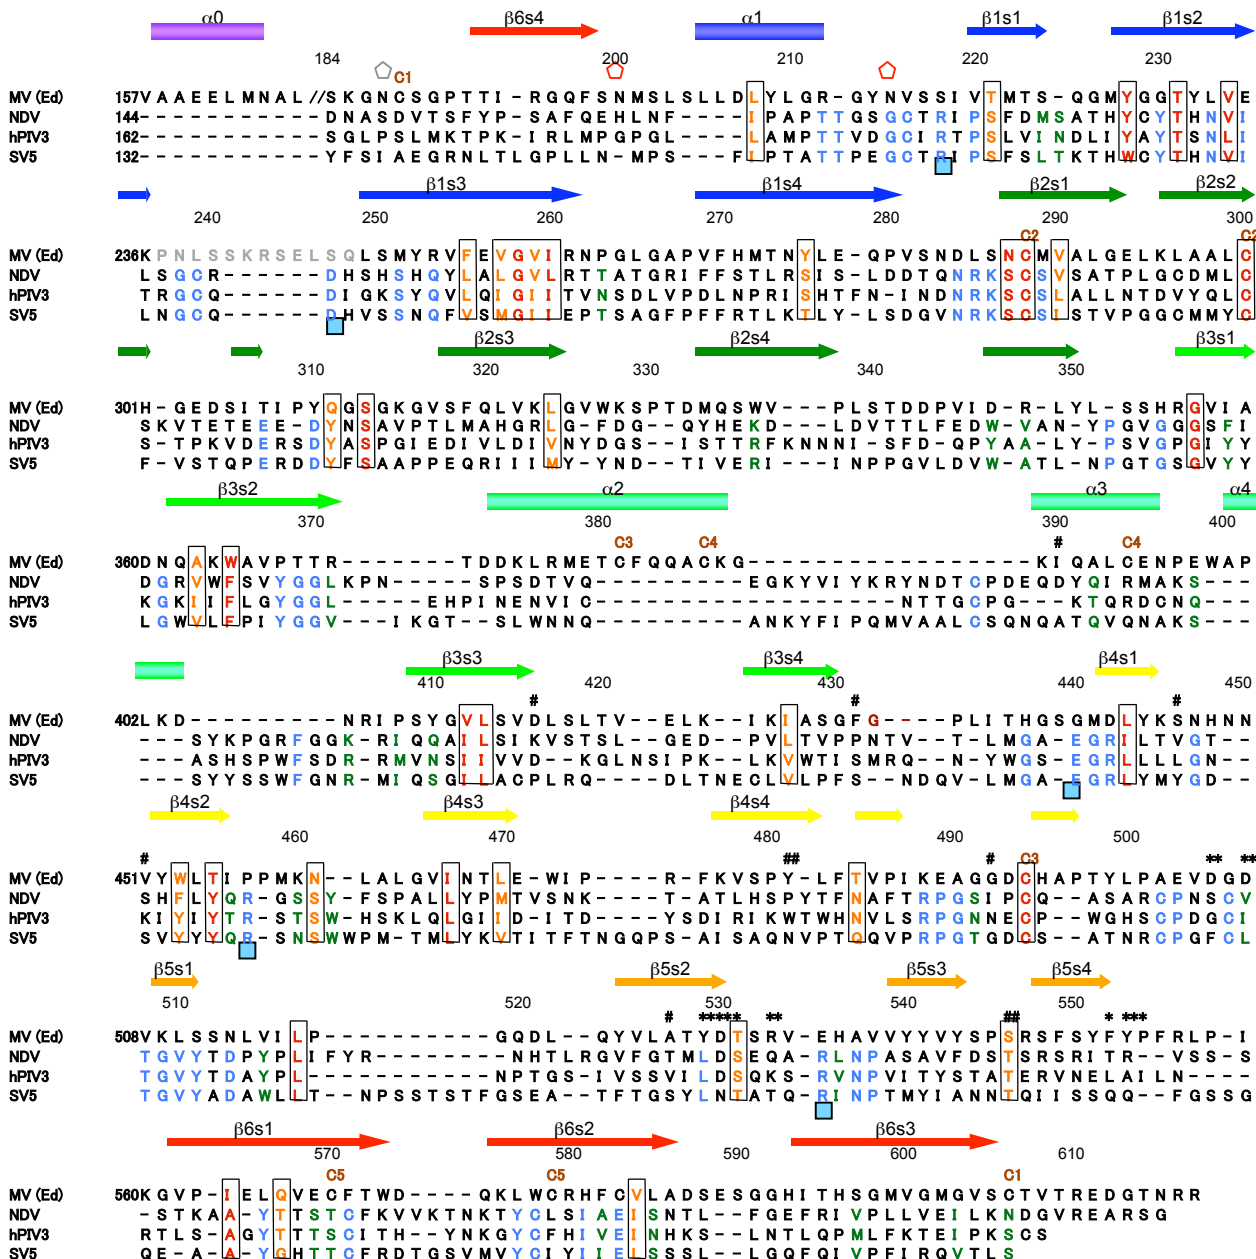

Supplement: pnas_0707830104_2.pdf [file pnas_0707830104_2.pdf]

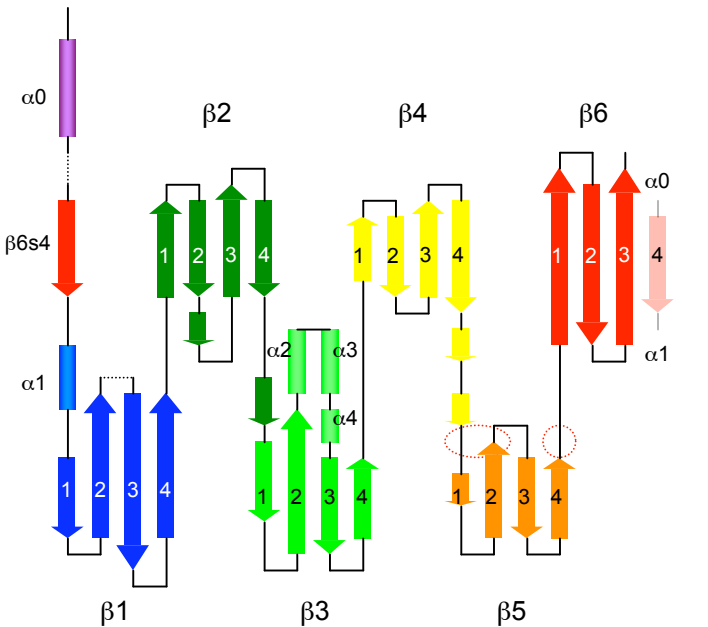

  Putative SLAM-binding sites

Supplement: pnas_0707830104_3.pdf [file pnas_0707830104_3.pdf]

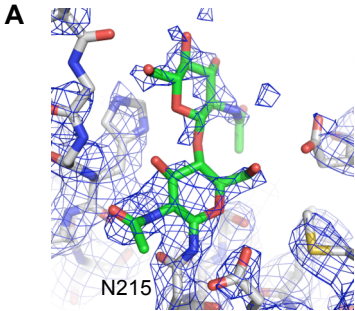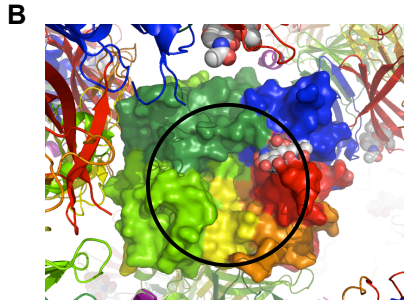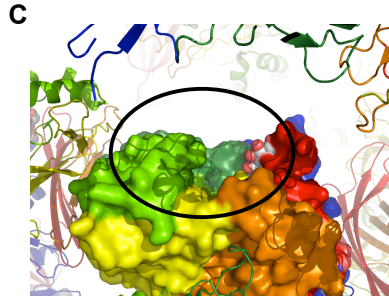

Supplement: pnas_0707830104_4.pdf [file pnas_0707830104_4.pdf]
